# Supplementary material for: Quadruple hydrogen bonded cytosine modules: N-1 functionalised arrays
Source: Royal Society of Chemistry journal article supplement (doi:10.1039/c1nj20162j), 2011-01-01

**SUPPORTING INFORMATION:**

**Quadruple Hydrogen Bonded Cytosine Modules: *N*-1  
Functionalised Arrays**

**Valerie G. H. Lafitte,<sup>a</sup> Abil E. Aliev,<sup>a</sup> Elisabetta Greco,<sup>a</sup> Kason Bala,<sup>b</sup> Peter Golding<sup>b</sup> and Helen C. Hailes<sup>\*a</sup>**

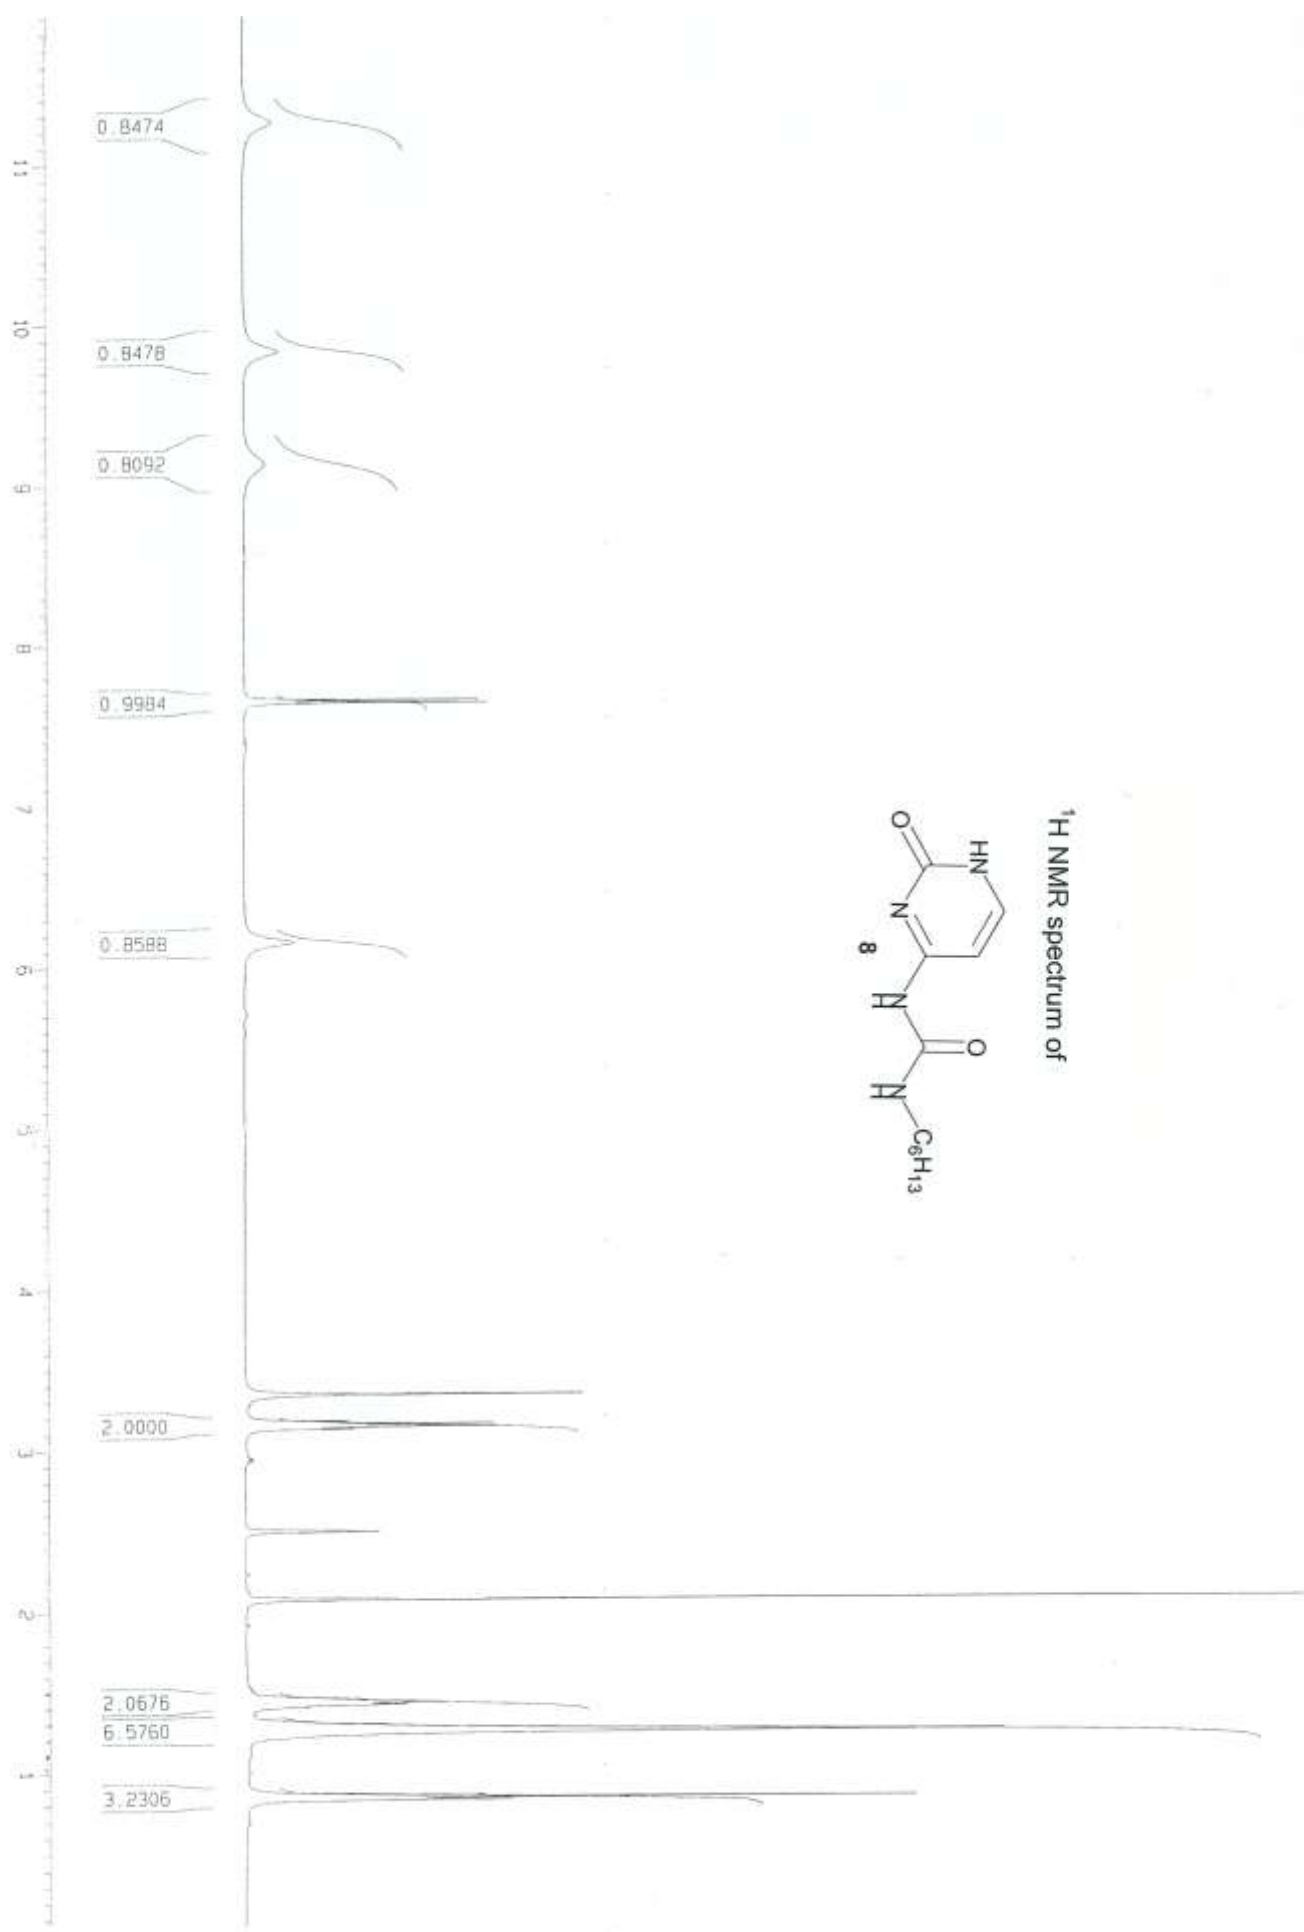

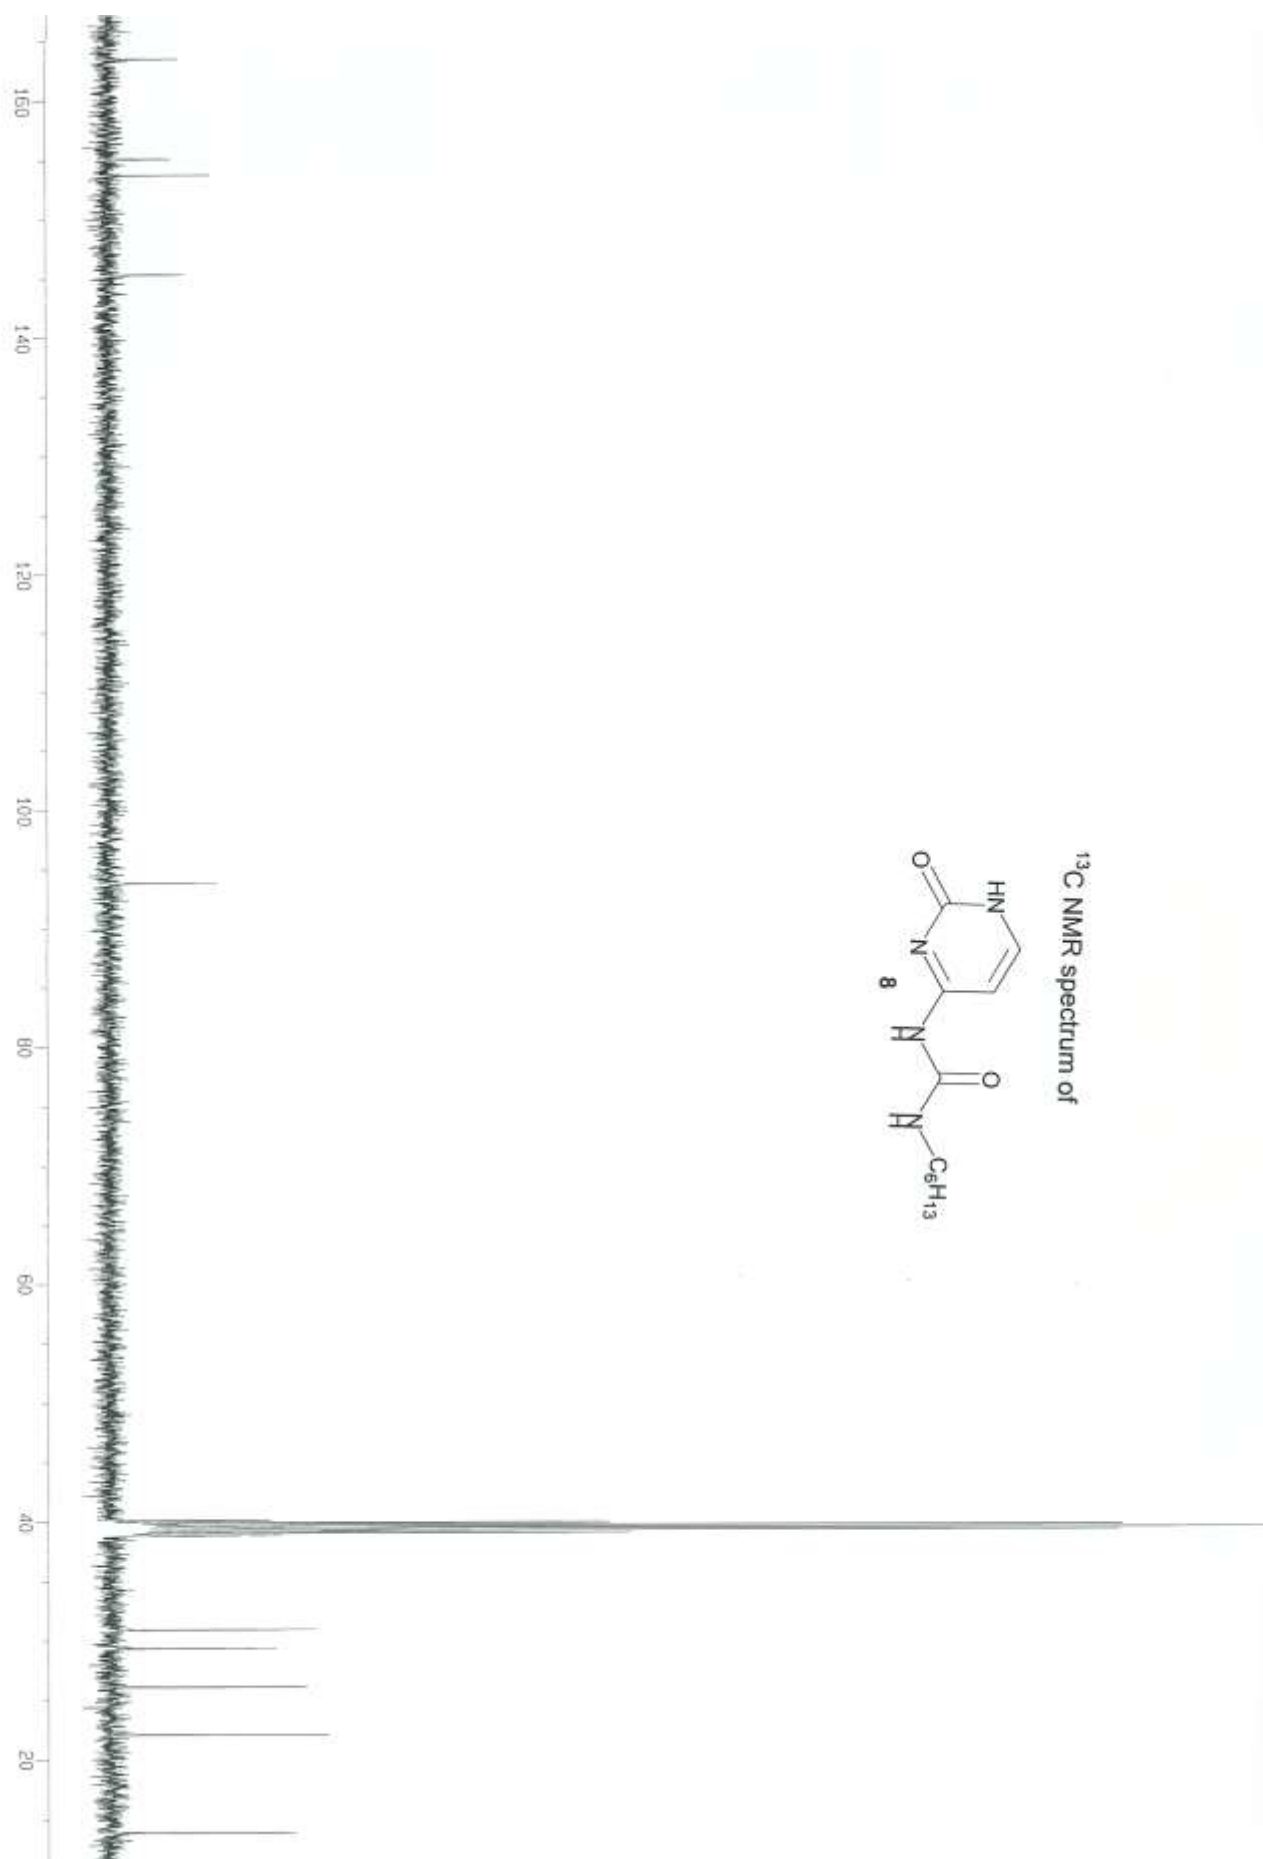

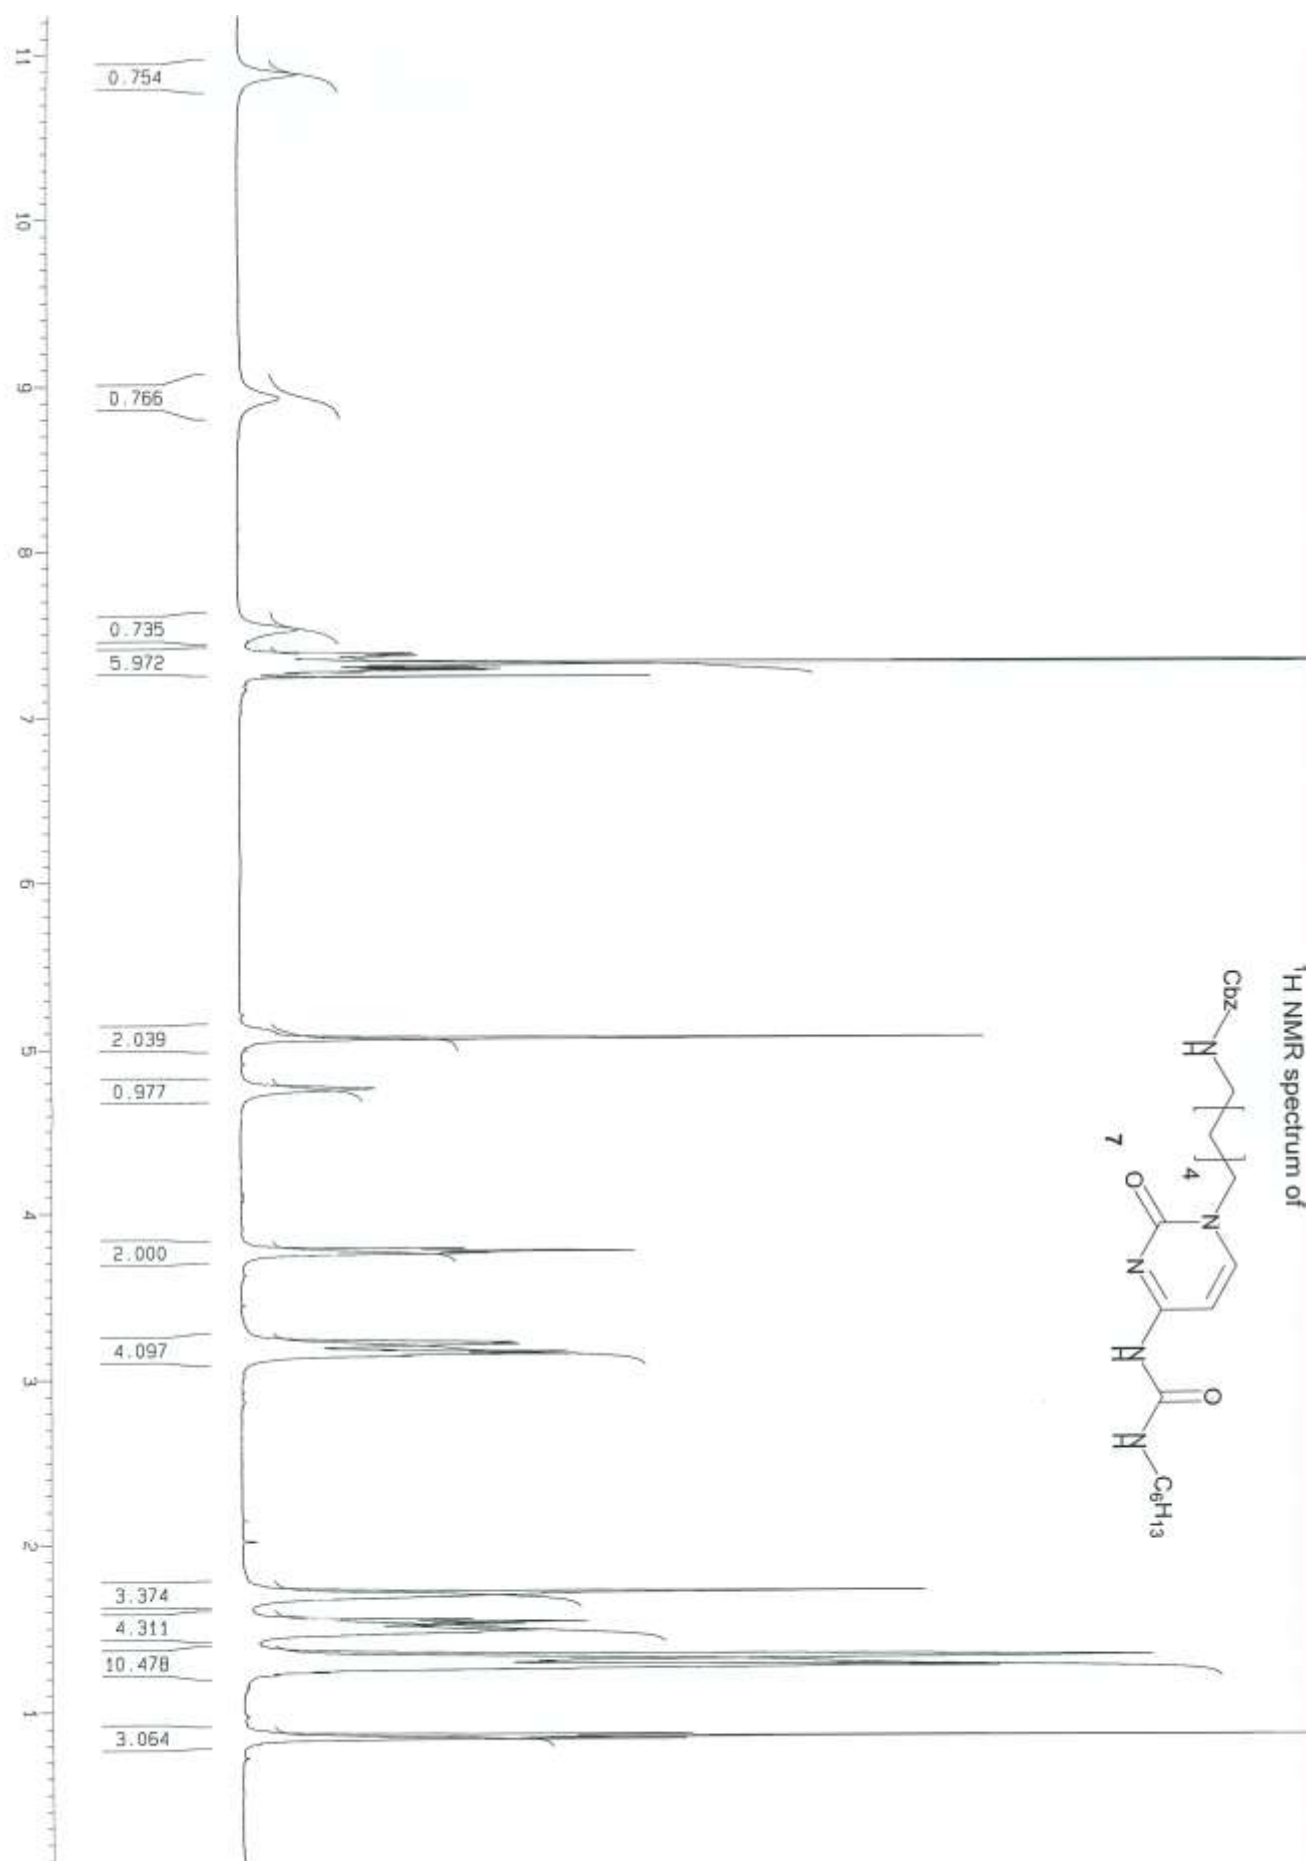

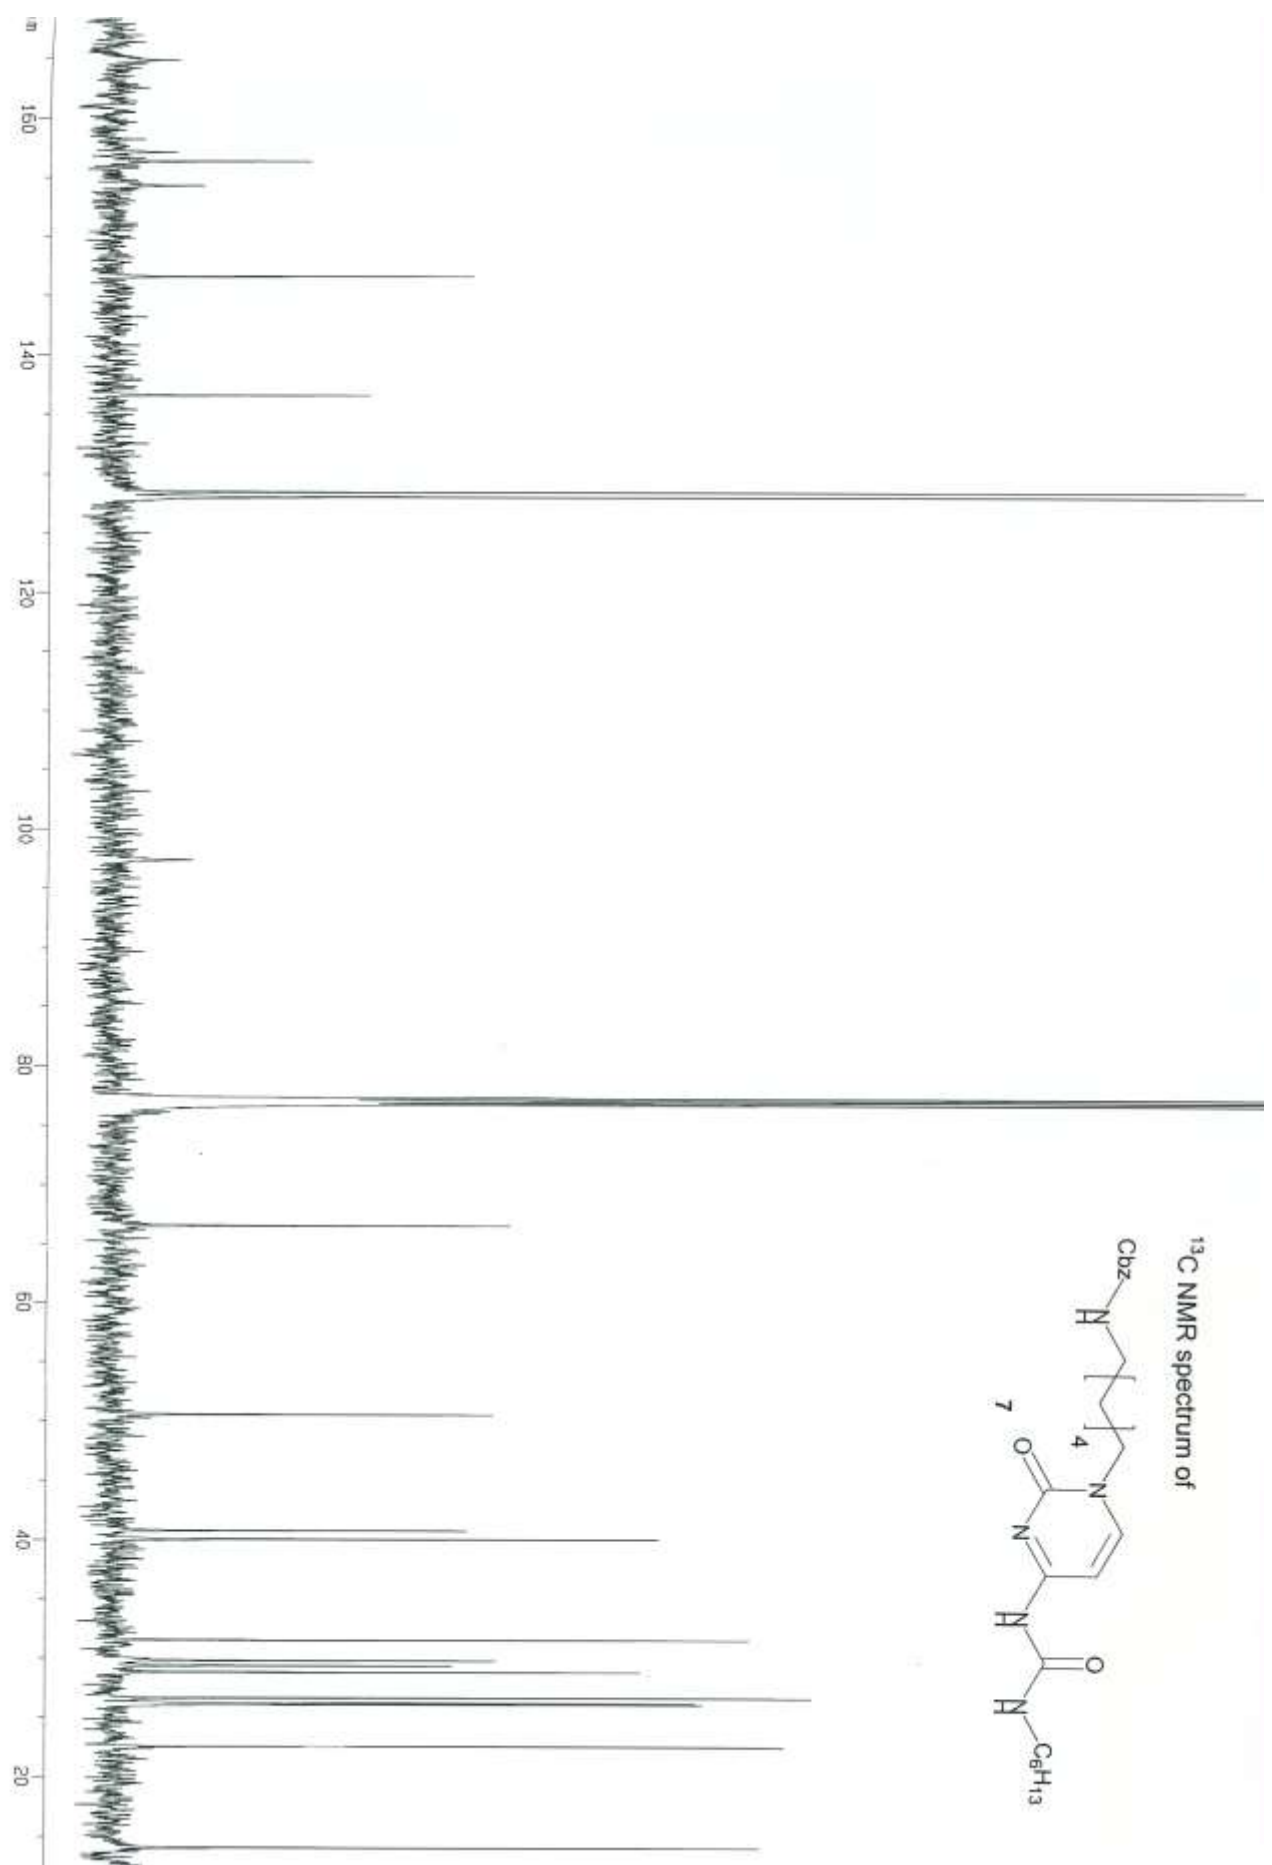

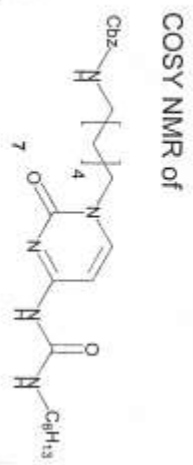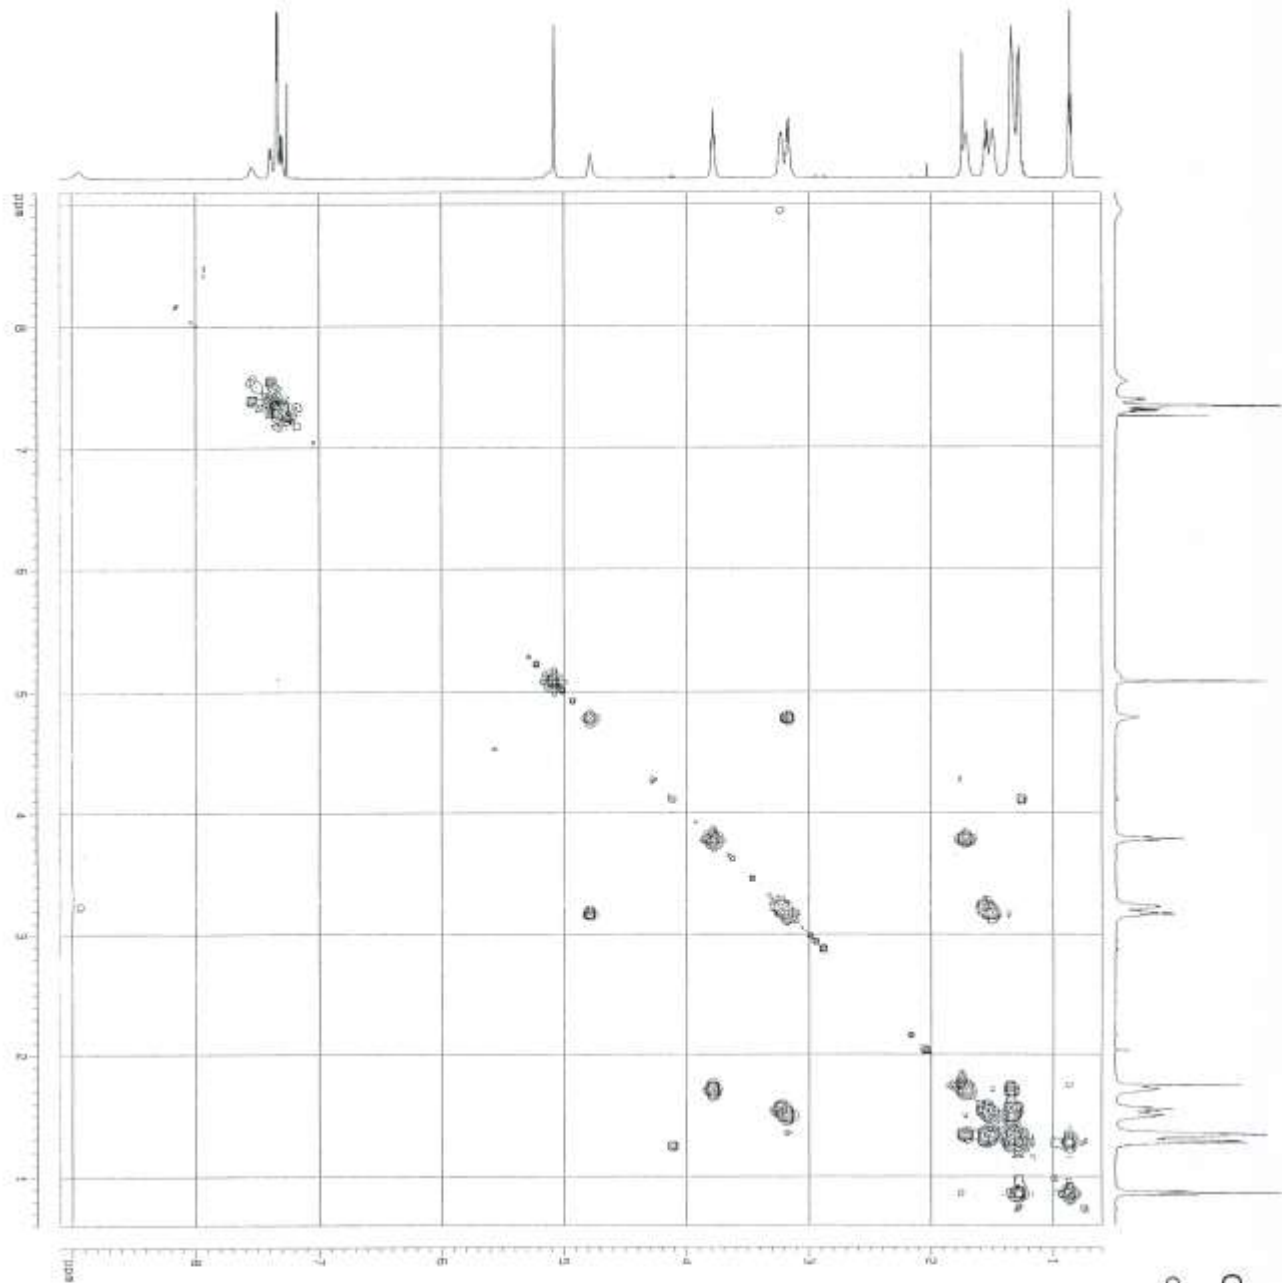

F2 - Acquisition Parameters

```

NAME      pyridin
PROCNO    2
PULPROG   zgpg30
TD         65536
SFO        400.136
AQ         1.911366
RG         2048
SD         0.025
SOLVENT   DMSO
NS         640
DS         4
SWH         12000.394
FIDRES     0.0001088
AQRES      0.0000028
SFO2       300.1360508
NUC1       15N
NUC2       13C

```

F1 - Acquisition Parameters

```

NAME      pyridin
PROCNO    2
PULPROG   zgpg30
TD         65536
SFO        400.136
AQ         1.911366
RG         2048
SD         0.025
SOLVENT   DMSO
NS         640
DS         4
SWH         12000.394
FIDRES     0.0001088
AQRES      0.0000028
SFO2       300.1360508
NUC1       15N
NUC2       13C

```

F1 - Processing parameters

```

SI         32768
SF         1200136.00
SF2        300136.00
WDW        EM
SS         2048
LB         2.00
GB         0
PC         0.025
SC         200.1360508
TC         200.1360508

```

F2 - Processing parameters

```

SI         32768
SF         1200136.00
SF2        300136.00
WDW        EM
SS         2048
LB         2.00
GB         0
PC         0.025
SC         200.1360508
TC         200.1360508

```

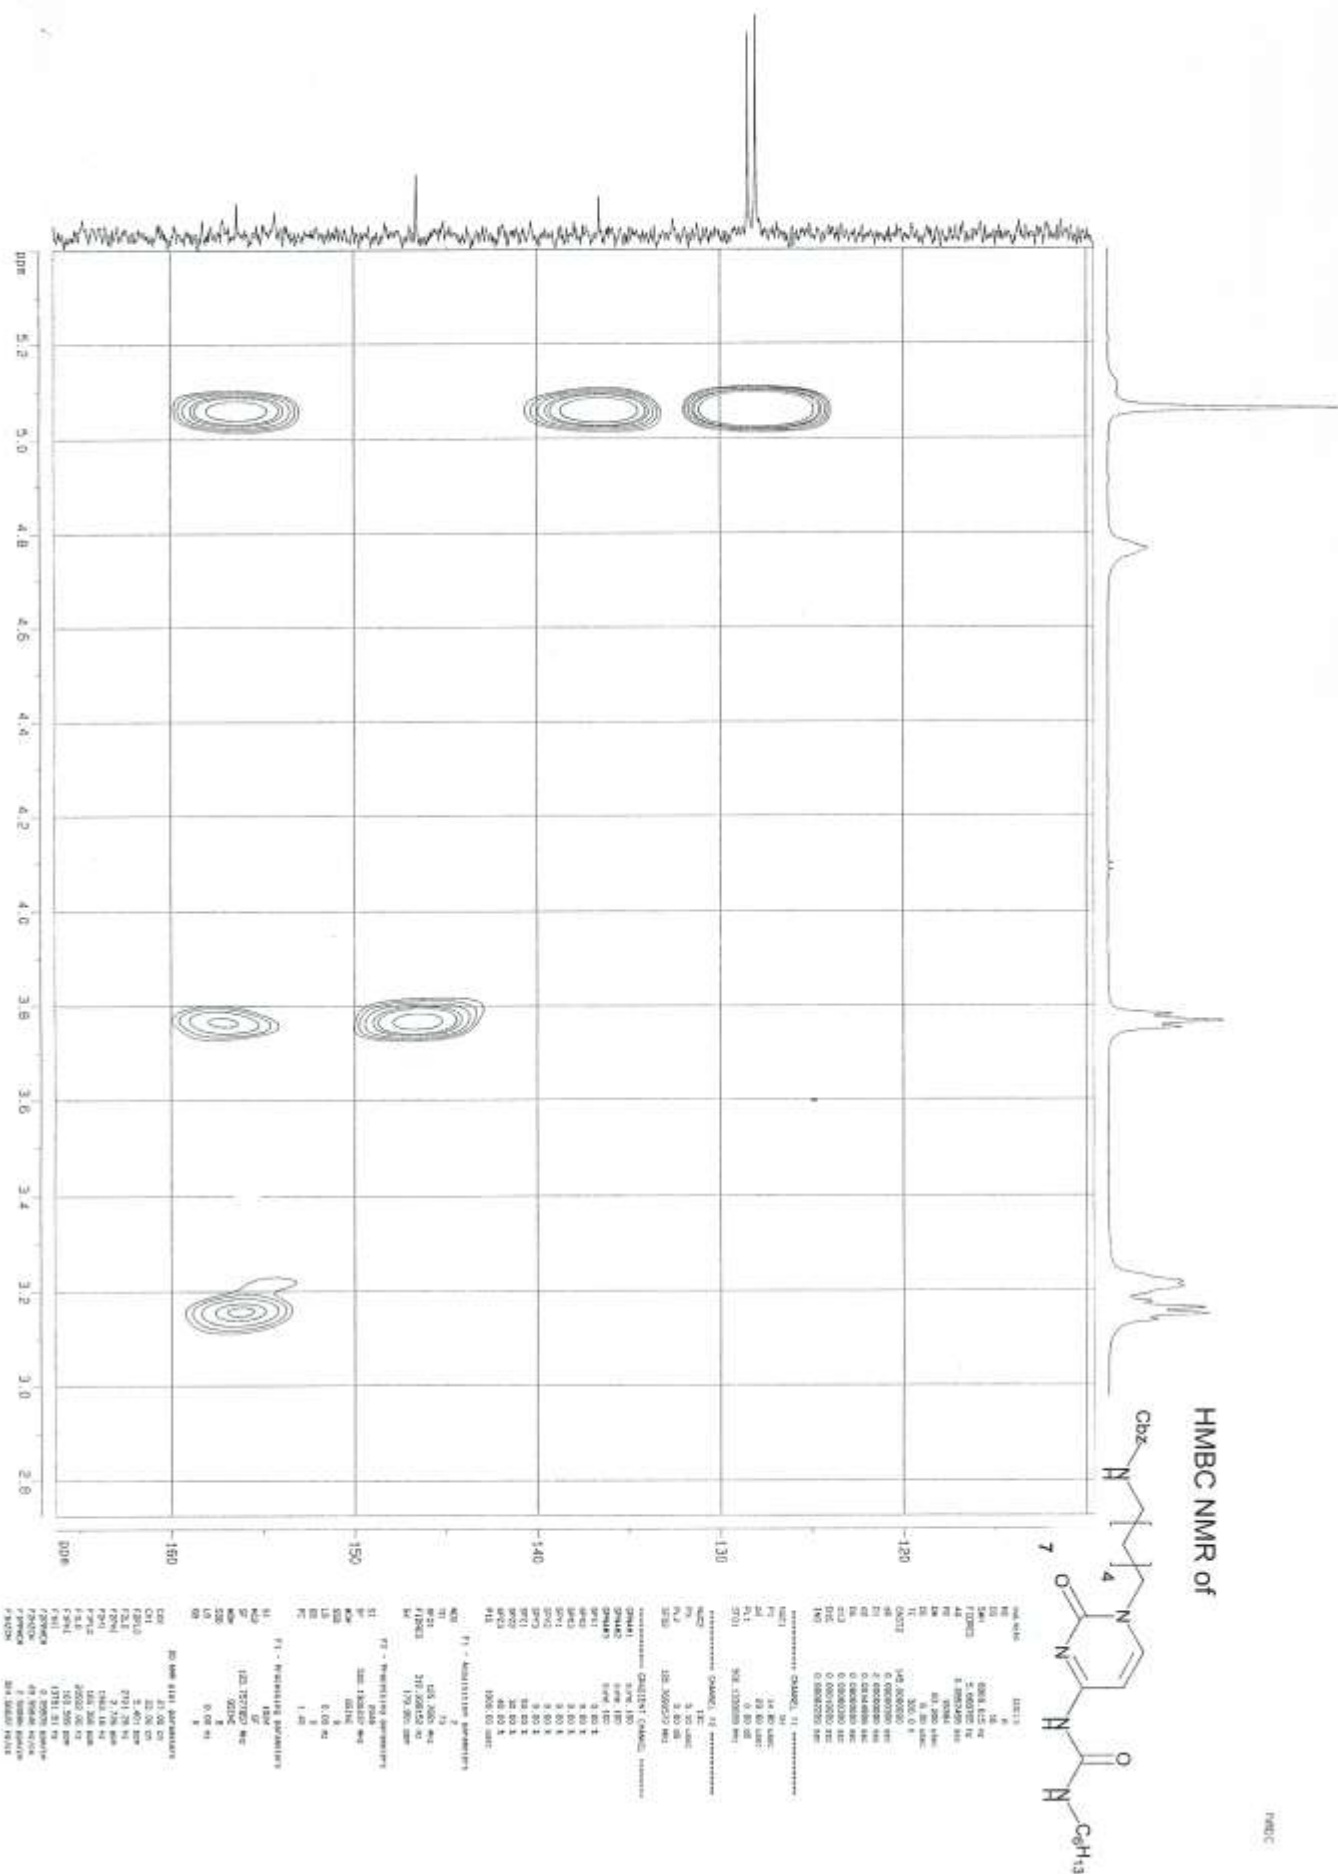

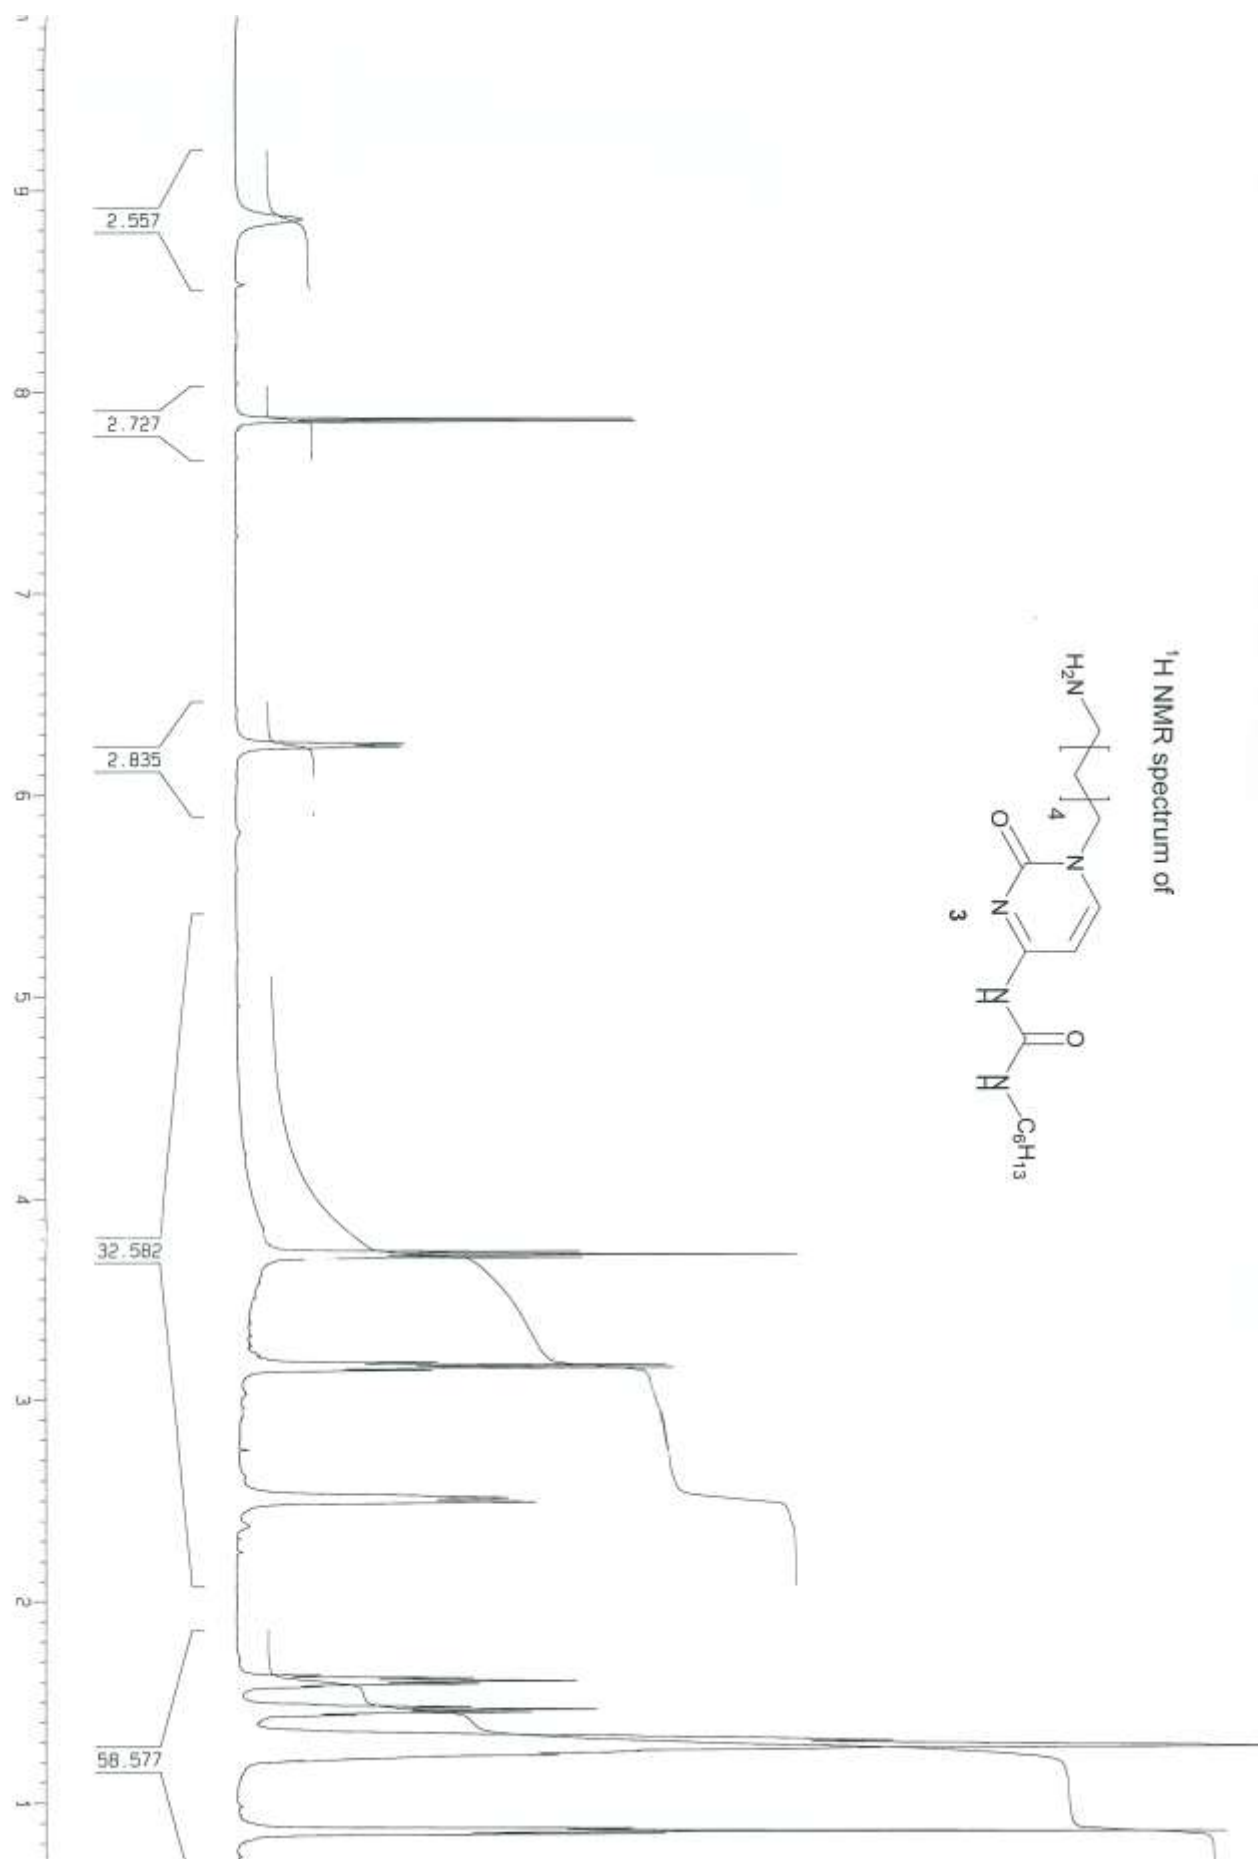



$^{13}\text{C}$  NMR spectrum of

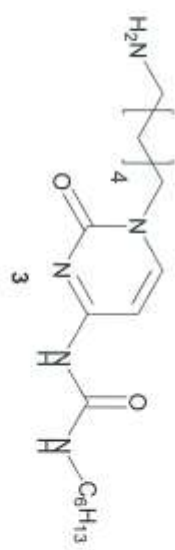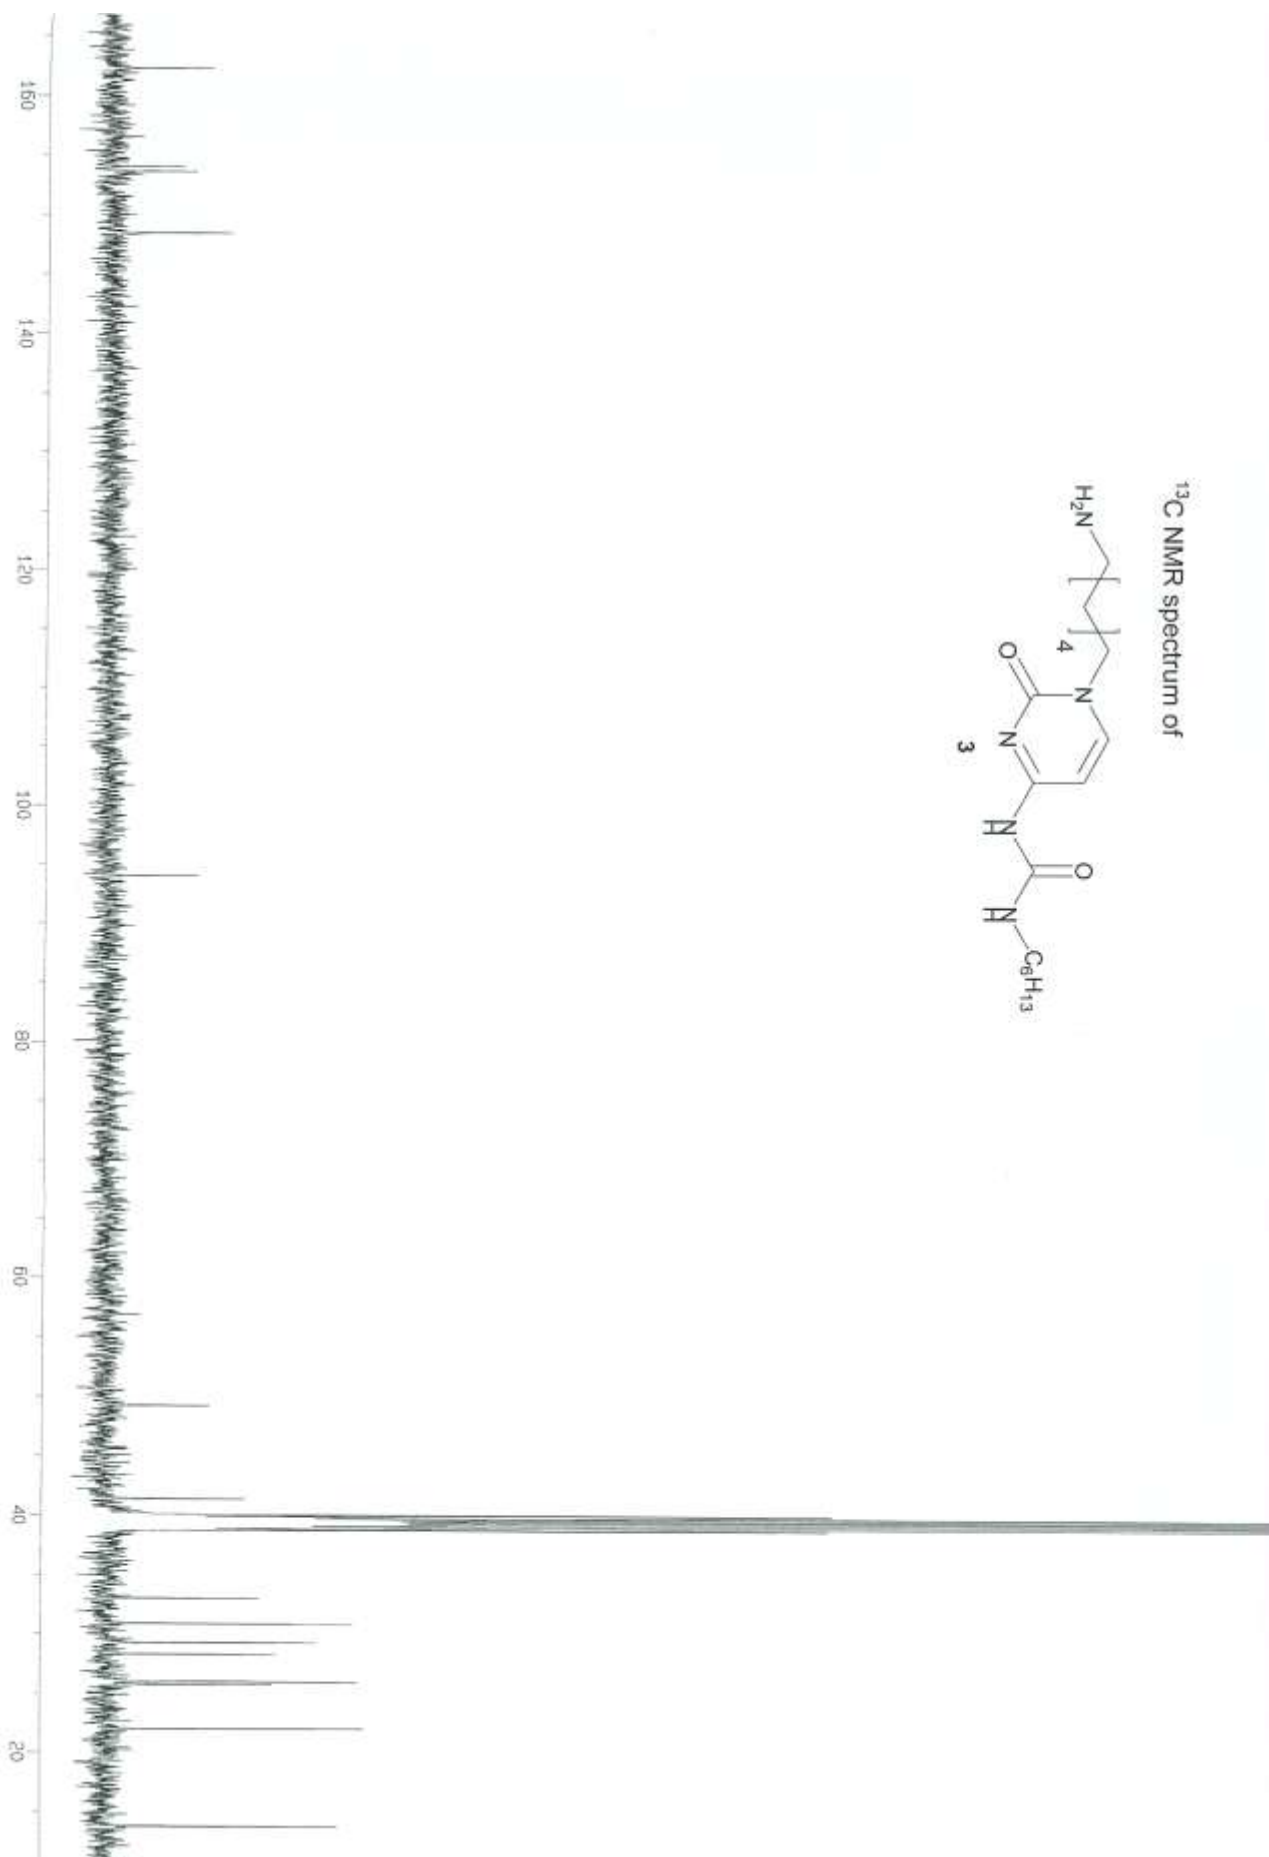

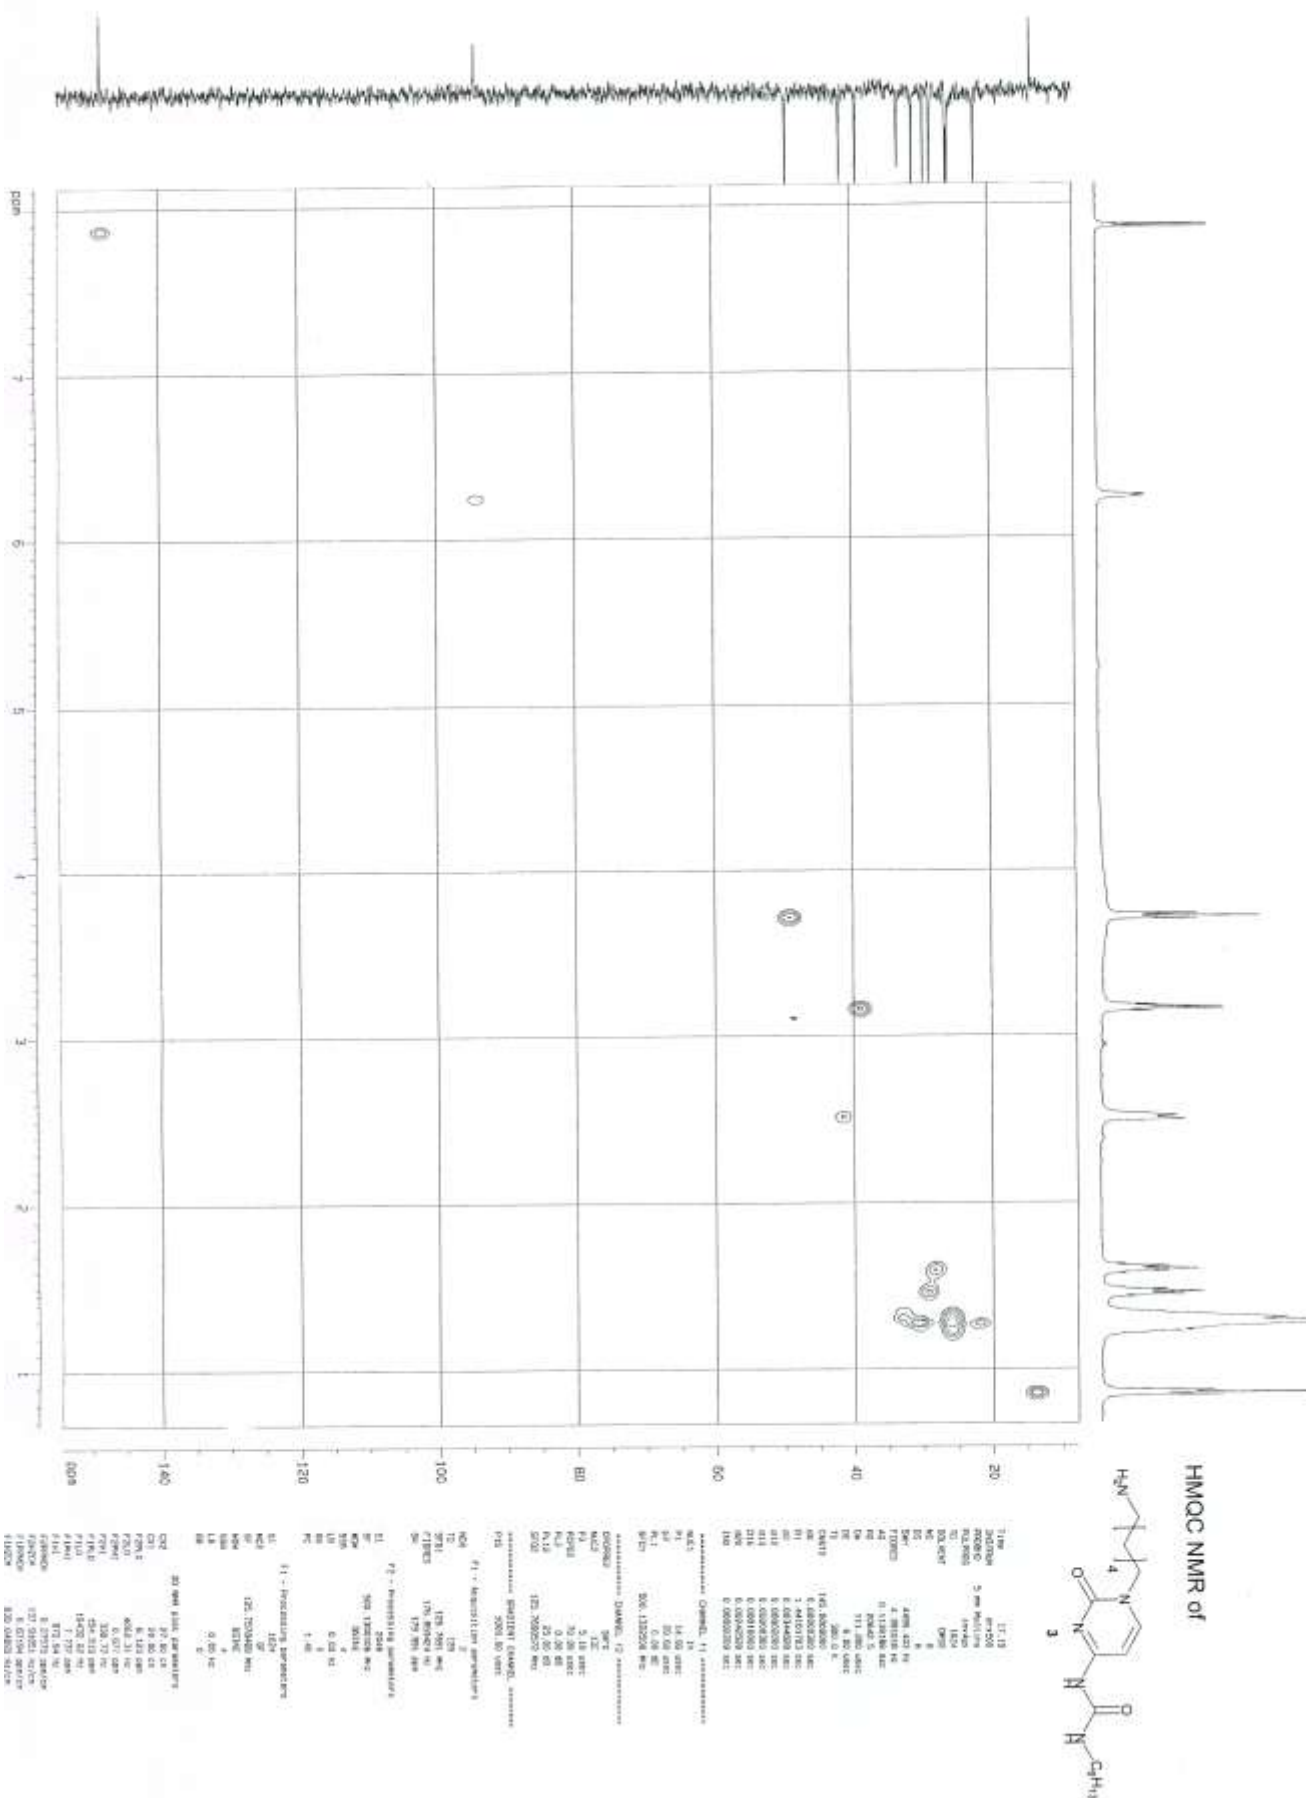

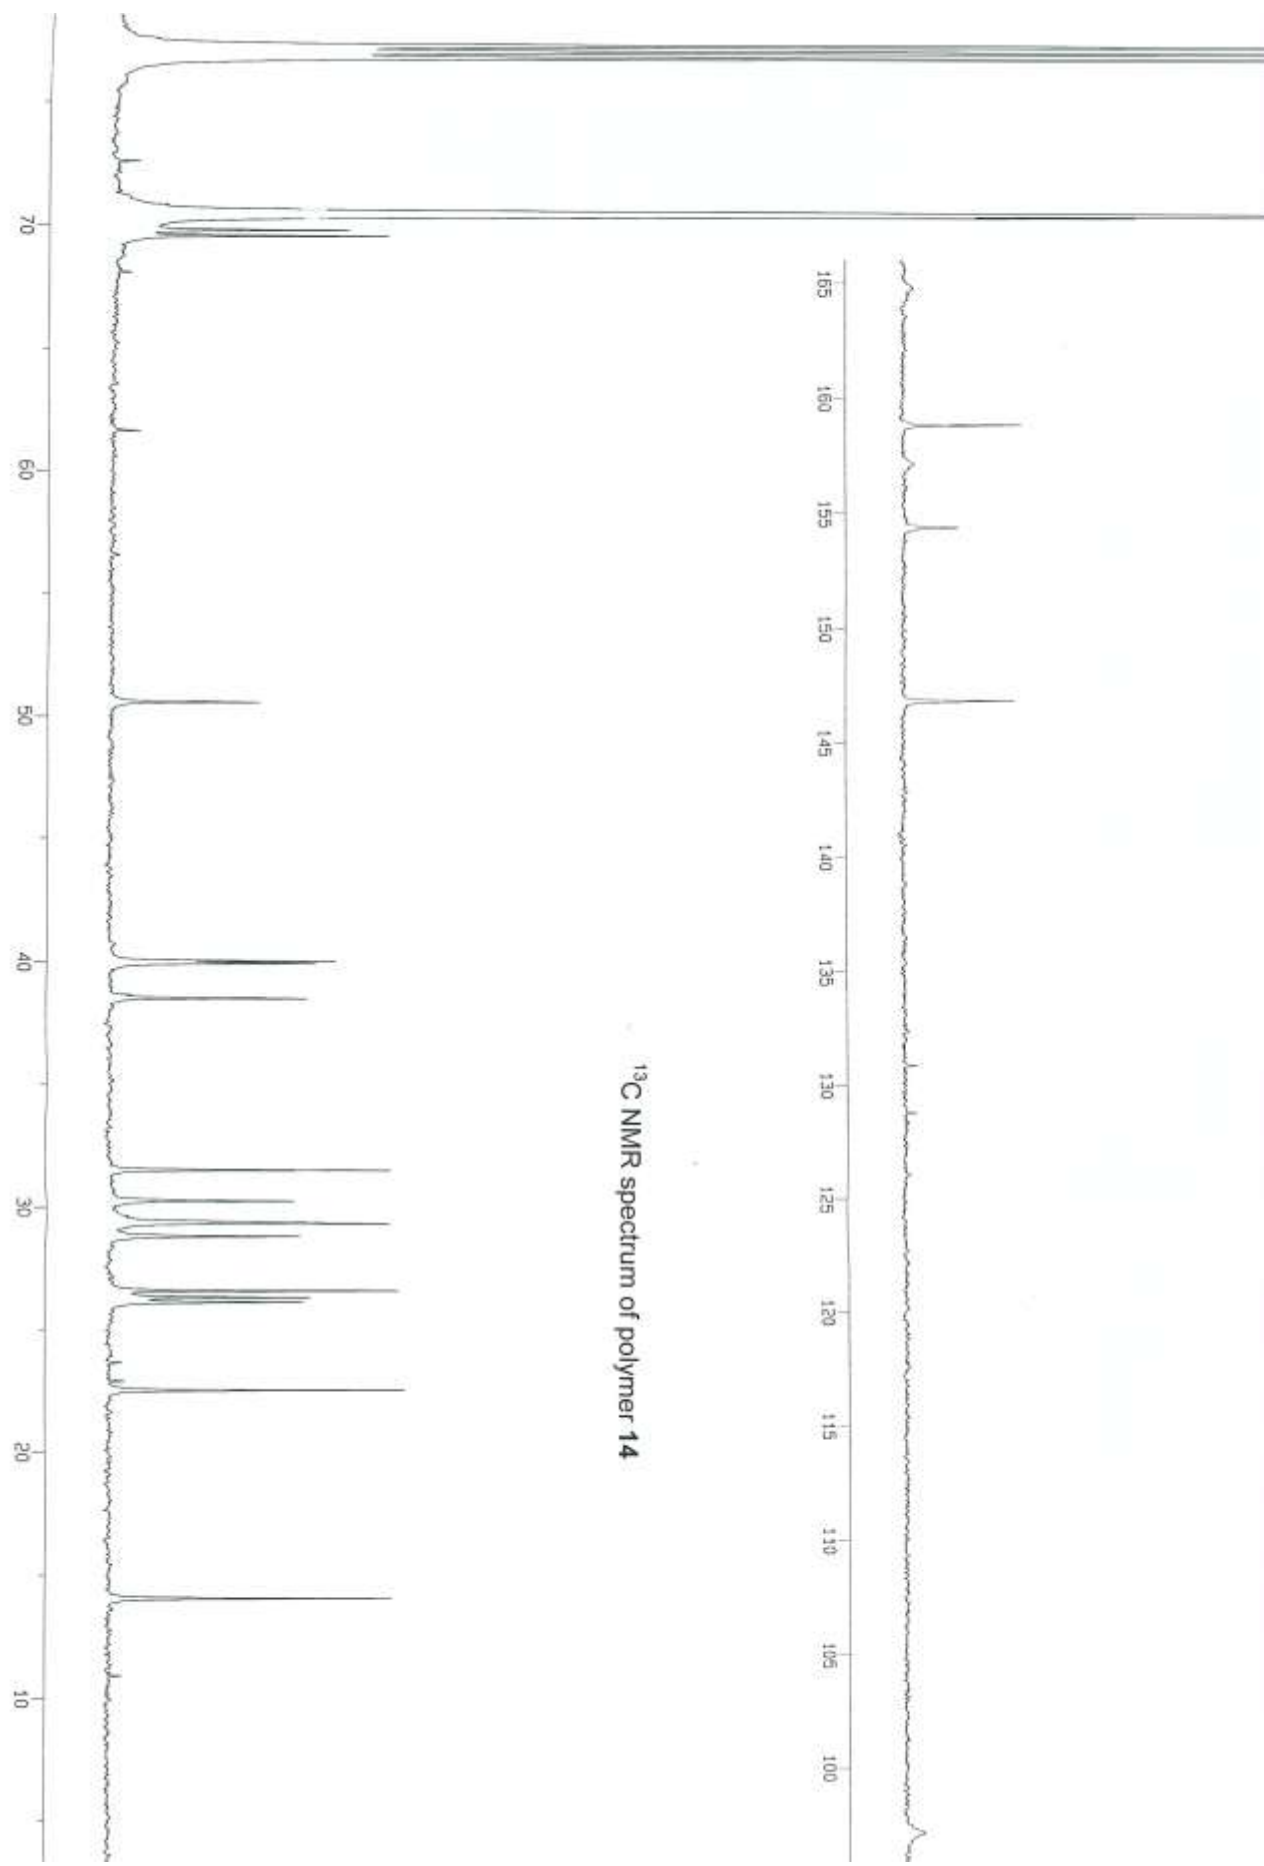

$^{13}\text{C}$  NMR spectrum of polymer 14

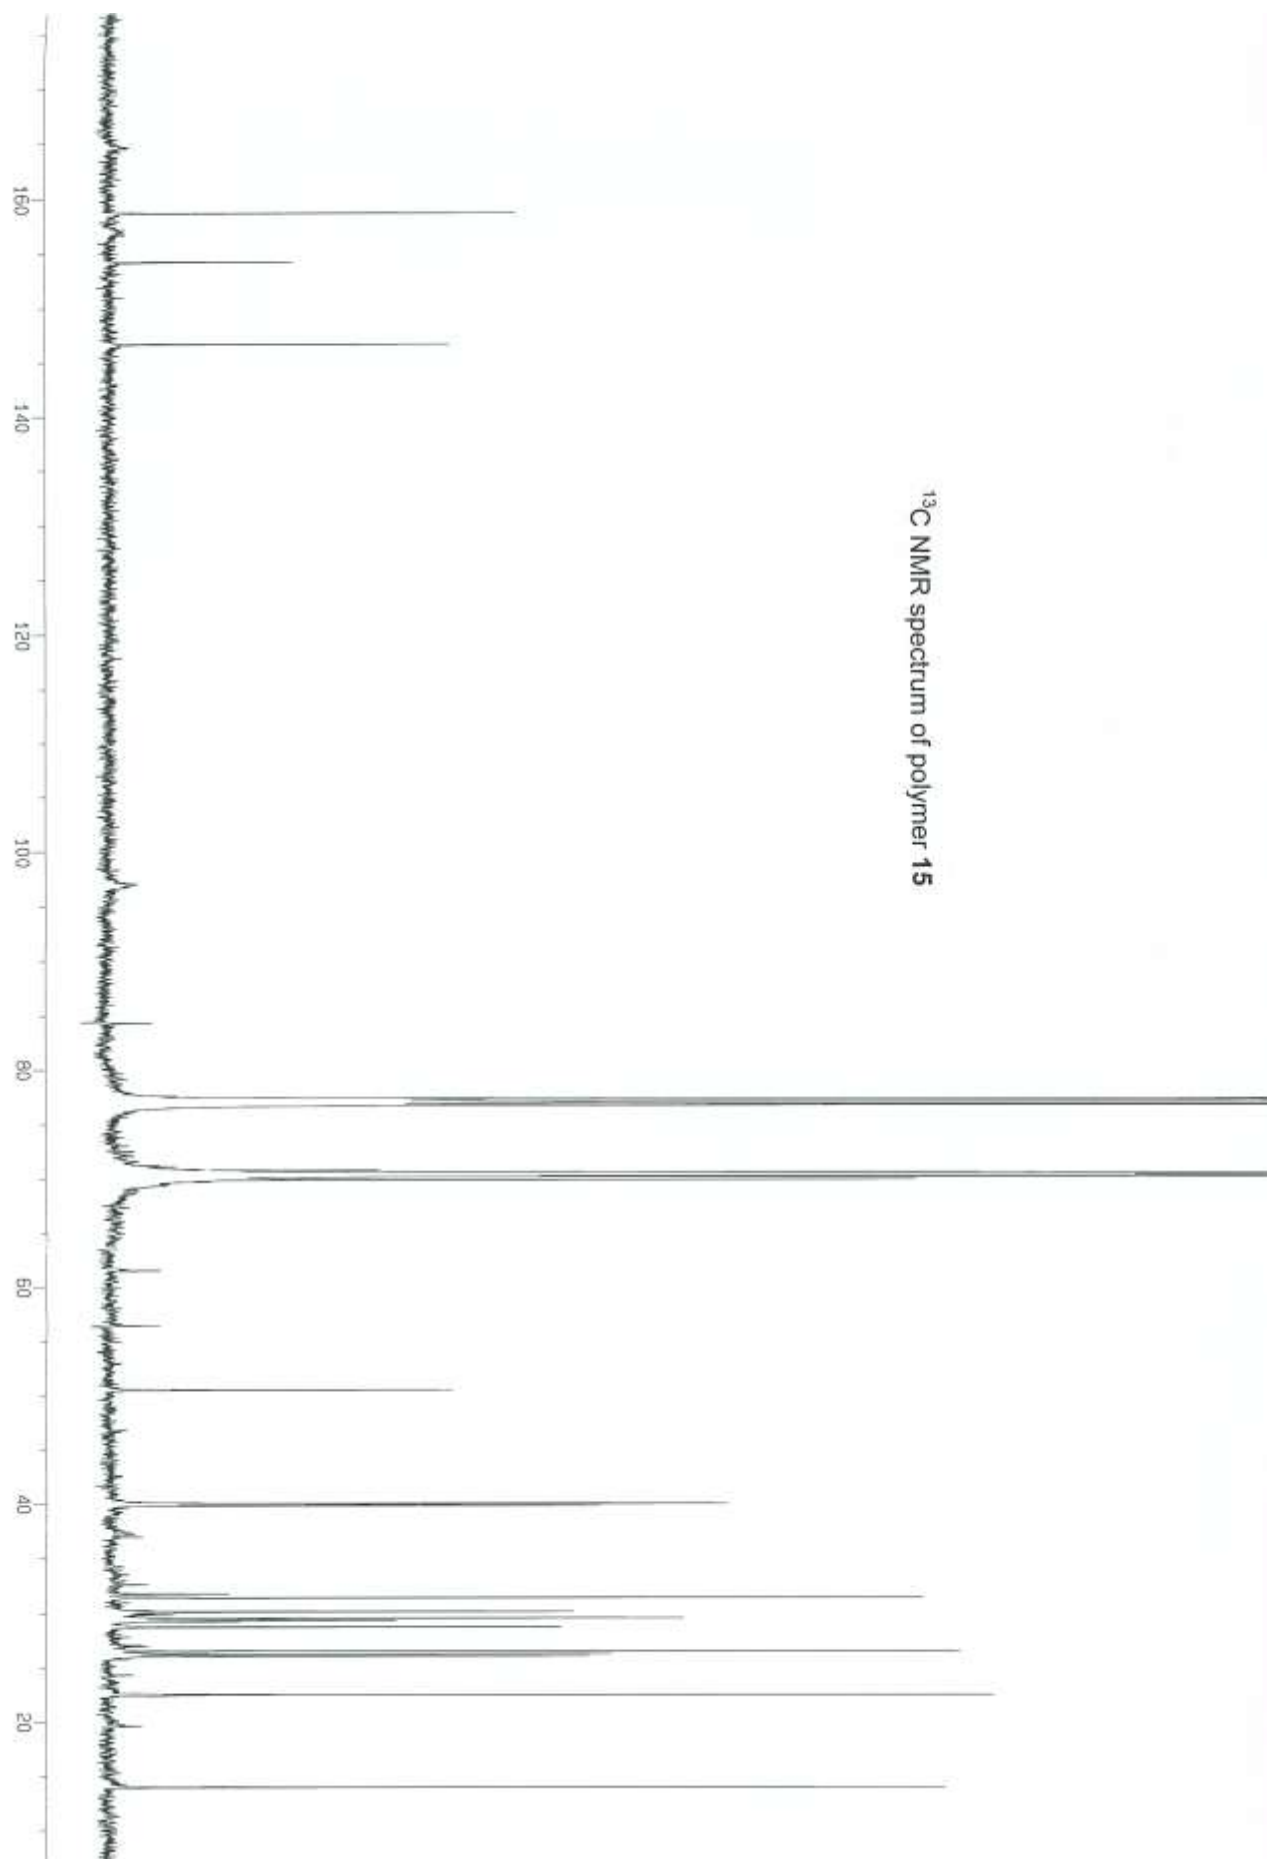

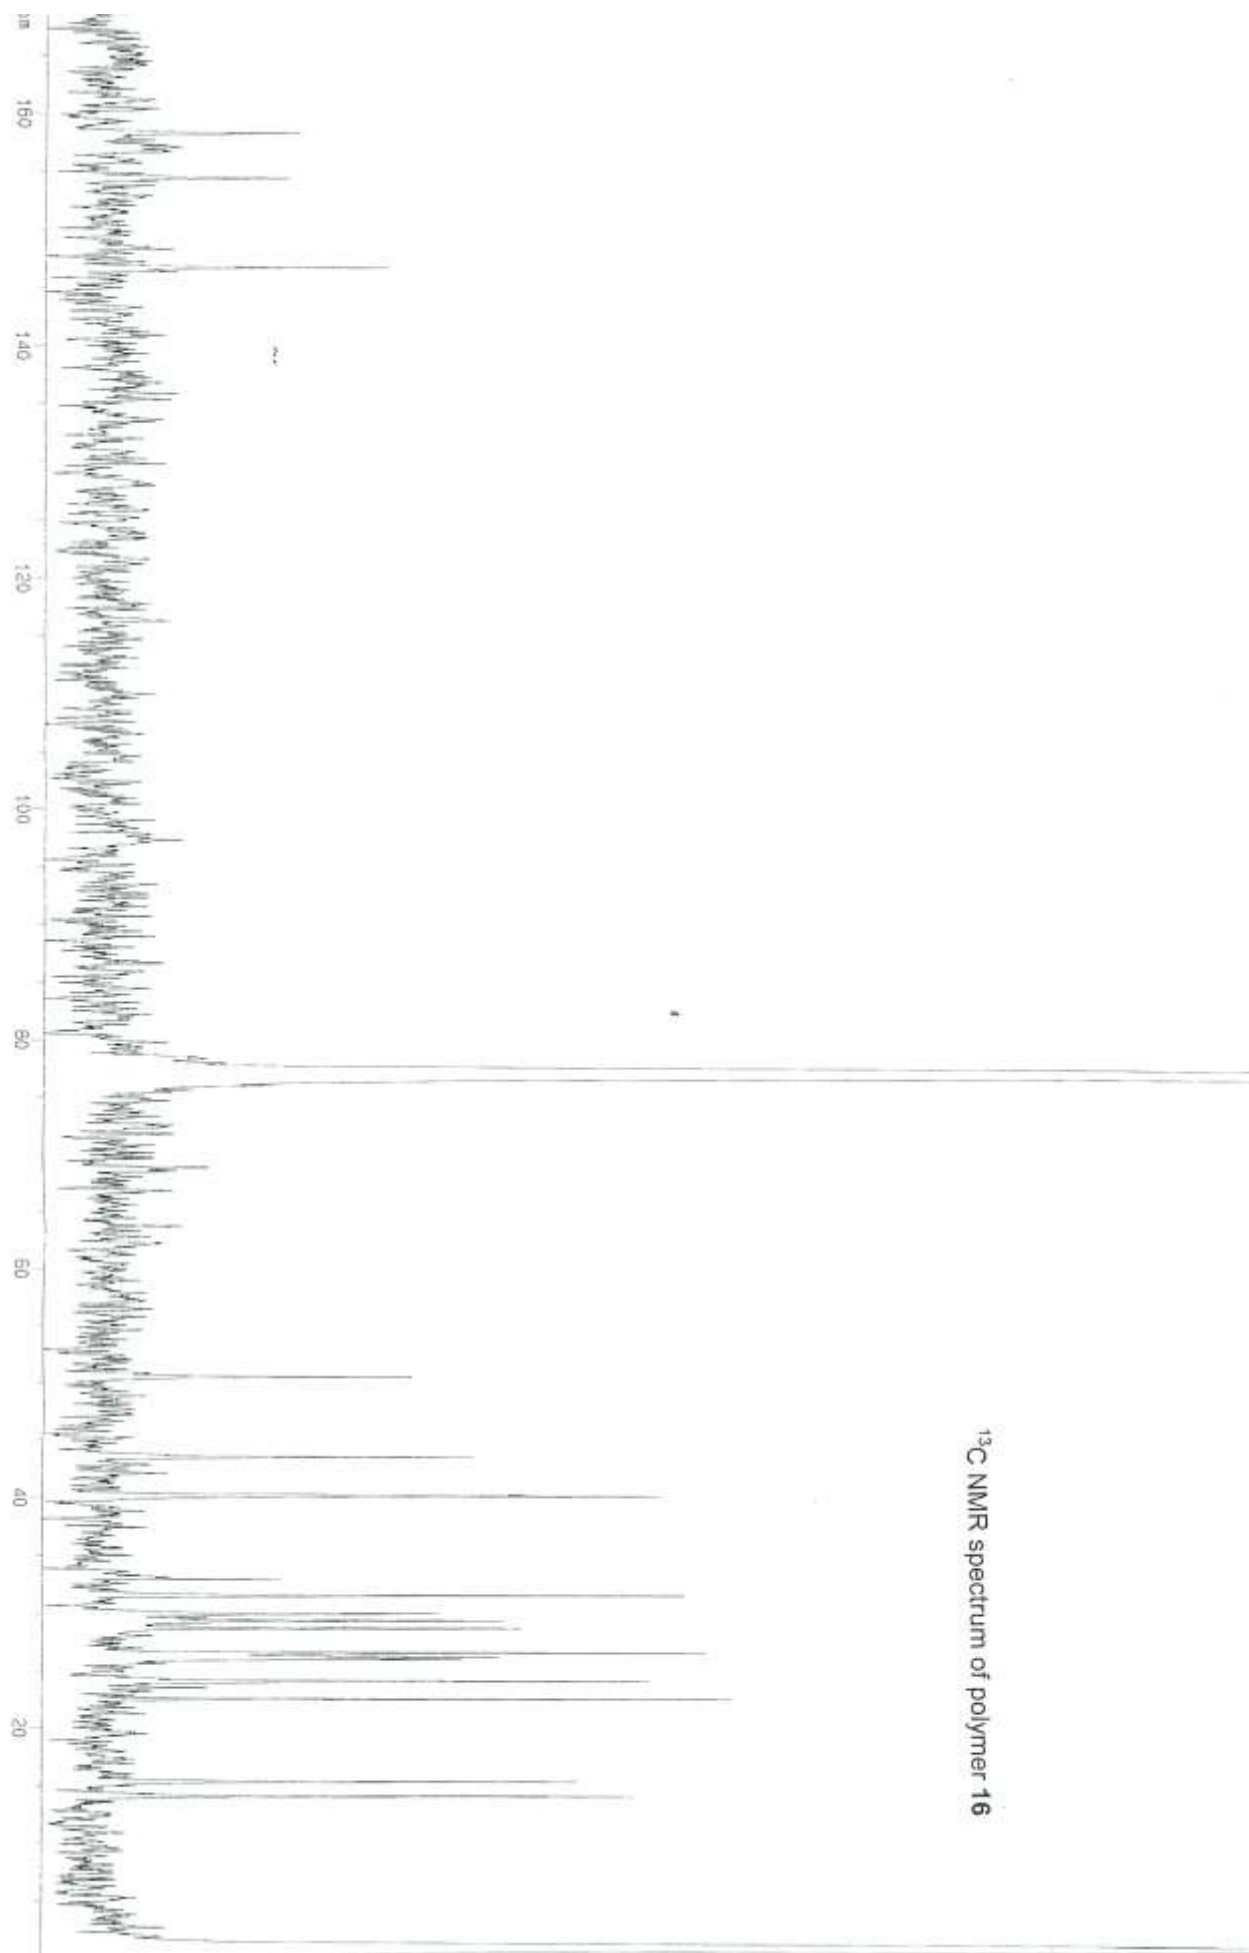

$^{13}\text{C}$  NMR spectrum of polymer 16

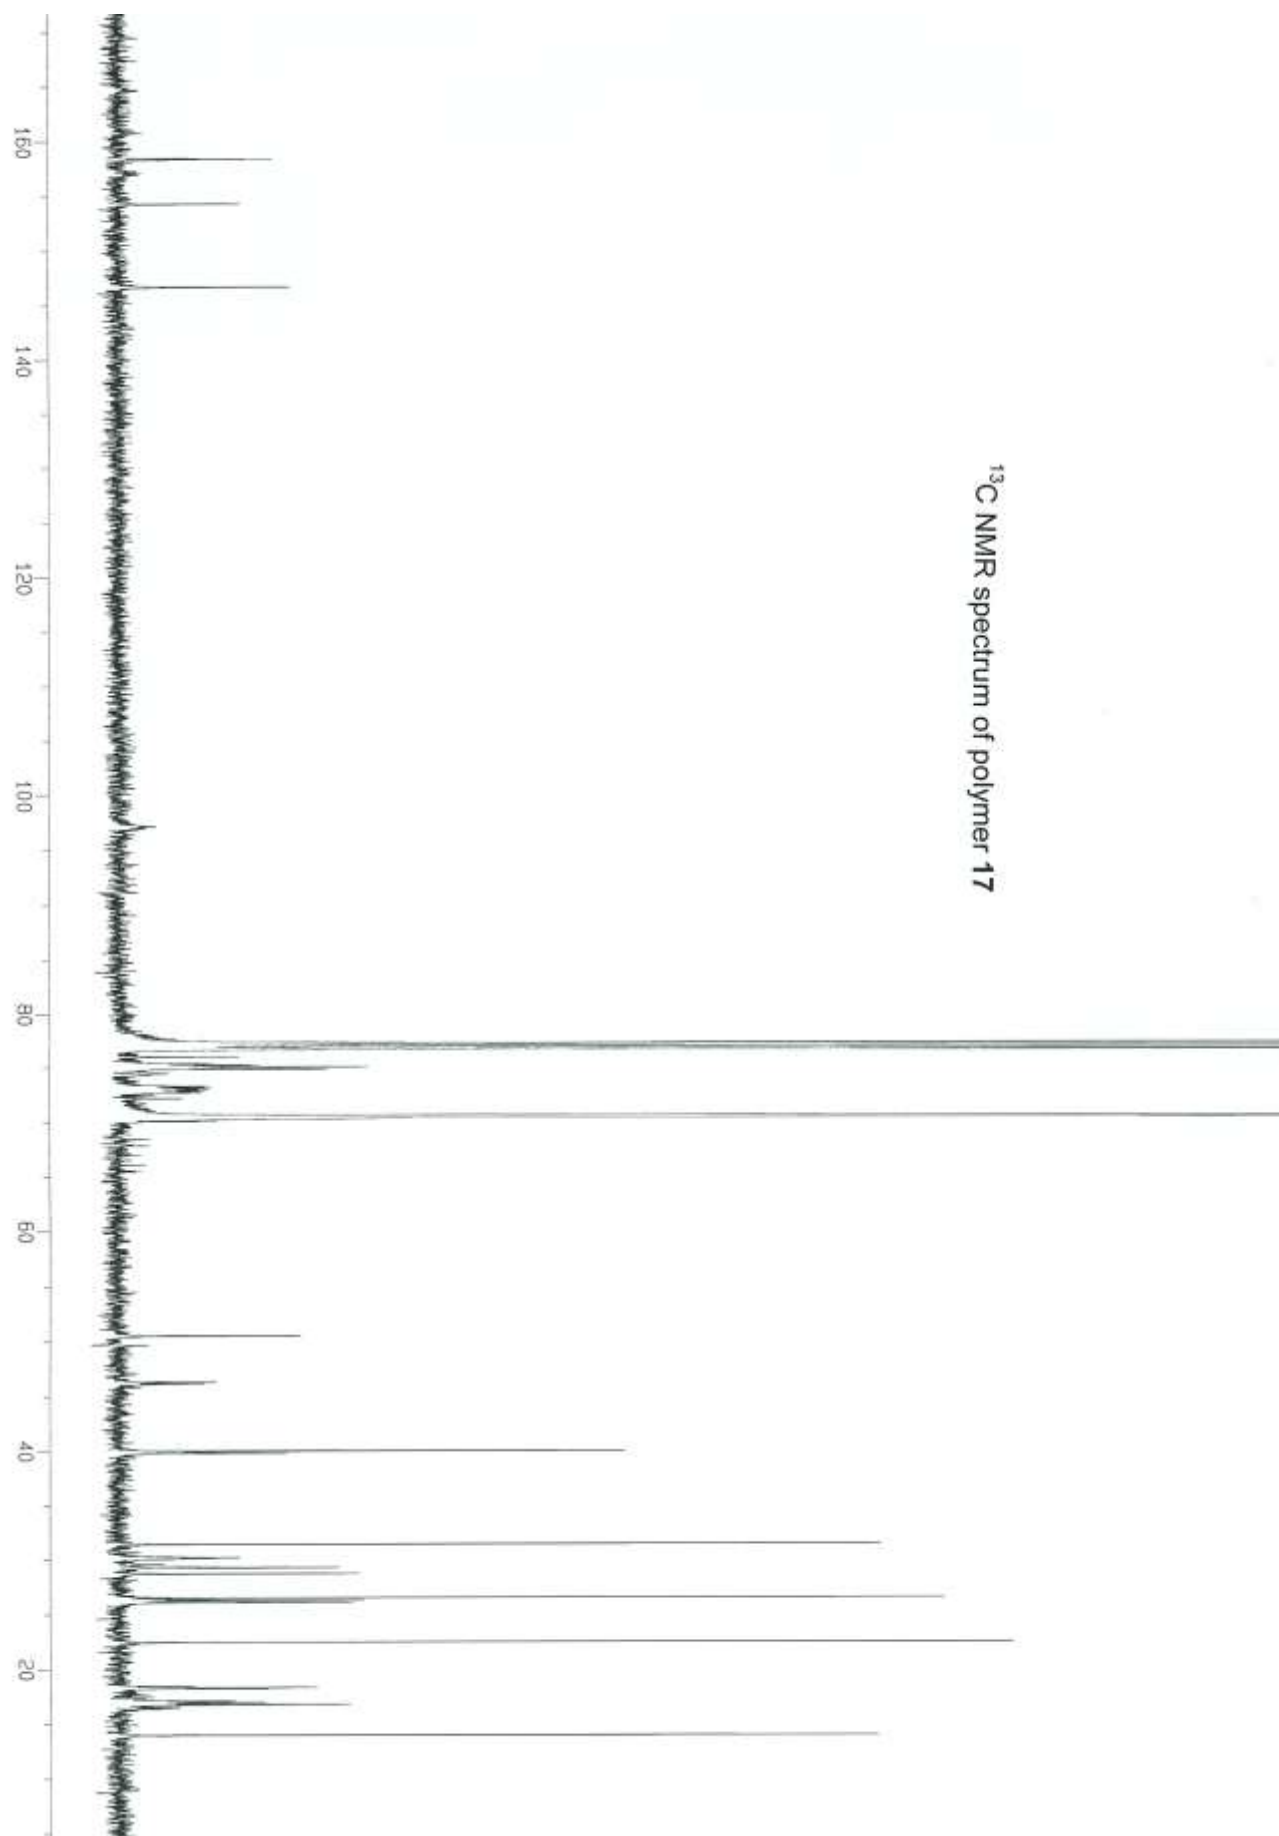

Supplement: c1nj20162j.pdf [file c1nj20162j.pdf]
